# Supplementary material for: An IL17RA frameshift variant in a Holstein cattle family with psoriasis-like skin alterations and immunodeficiency
Source: BMC Genet. 2020 May 24;21:55. doi: 10.1186/s12863-020-00860-4 (PMC7247147; doi:10.1186/s12863-020-00860-4)
Supplement: Supplementary file 1 — Additional file 1. Results of peripheral blood analyses. [file 12863_2020_860_MOESM1_ESM.xlsx]

## Sheet: Additional file 1
Additional file 1: Results of peripheral blood analyses for calf 1 and calf 2.
Parameter	Range	Calf 1	Calf 2
Erythrocytes	5-8 T/L	8.79	12.31
Haemoglobin	5.6-8.1 mmol/L	6.8	7.7
PCV	0.28-0.36 l/L	0.35	0.45
PLT	200-800 G/L	230	342
Leukocytes	4-10 G/L	14.1	19.6
Band cells	0-2 %	1	1
Segmented neutrophils	20-50 %	83	64
Lymphocytes	45-65 %	16	30
Monocytes	0-4 %		5
Glucose	4.0-6.6 mmol/L	2.7	2.7
Lactate	< 2.2 mmol/L	0.6	0.8
BUN	< 5.5 mmol/L	< 3.3	< 3.3
Total bilirubin	< 8.5 µmol/L	< 8.5	< 8.5
Total protein	40-60 g/L	89	86
Albumin	30-40 g/L	14.6	17.4
Glutar clotting time	> 15 min.	2	3
AST	< 40 U/L	29	23
GGT	< 20 U/L	11	12
GLDH	< 10 U/L	9	12
CK	< 100 U/L	12	16
GSH-PX	> 250 U/gHb	477	580
Na	135-150 mmol/L	129	133
K	4-5 mmol/L	2.9	4
Cl	90-105 mmol/L	87	89
Ion. Ca	1.1-1.3 mmol/L	1.25	1.35
Mg	0.7-1.4 mmol/L	0.4	0.49
P	2-3 mmol/L	1.4	1.8
Cu	8-39 µmol/L	17.5	19.7
Zn	10-20 µmol/L	28.4	22.8
pH		7.39	7.36
BE	-3 to +3 mmol/L	1.6	4
HCO3		25.5	27.5
