# Supplementary material for: An IL17RA frameshift variant in a Holstein cattle family with psoriasis-like skin alterations and immunodeficiency
Source: BMC Genet. 2020 May 24;21:55. doi: 10.1186/s12863-020-00860-4 (PMC7247147; doi:10.1186/s12863-020-00860-4)
Supplement: Supplementary file 5 — Additional file 5. EBI accession numbers of all publicly available genome sequences. [file 12863_2020_860_MOESM5_ESM.xlsx]

## Sheet: Additional file 4
Additional file 5: EBI Accession numbers of all publicly available genome sequences.
EBI Project ID	EBI Sample ID
PRJEB18113	SAMEA5159760
PRJEB18113	SAMEA5159761
PRJEB18113	SAMEA5159762
PRJEB18113	SAMEA5159763
PRJEB18113	SAMEA5159765
PRJEB18113	SAMEA5159766
PRJEB18113	SAMEA5159767
PRJEB18113	SAMEA5159768
PRJEB18113	SAMEA5159769
PRJEB18113	SAMEA5159770
PRJEB18113	SAMEA5159771
PRJEB18113	SAMEA5159772
PRJEB18113	SAMEA5159773
PRJEB18113	SAMEA5159774
PRJEB18113	SAMEA5159775
PRJEB18113	SAMEA5159776
PRJEB18113	SAMEA5159777
PRJEB18113	SAMEA5159778
PRJEB18113	SAMEA5159779
PRJEB18113	SAMEA5159780
PRJEB18113	SAMEA5159781
PRJEB18113	SAMEA5159782
PRJEB18113	SAMEA5159783
PRJEB18113	SAMEA5159784
PRJEB18113	SAMEA5159785
PRJEB18113	SAMEA5159786
PRJEB18113	SAMEA5159787
PRJEB18113	SAMEA5159788
PRJEB18113	SAMEA5159789
PRJEB18113	SAMEA5159790
PRJEB18113	SAMEA5159791
PRJEB18113	SAMEA5159792
PRJEB18113	SAMEA5159793
PRJEB18113	SAMEA5159794
PRJEB18113	SAMEA5159795
PRJEB18113	SAMEA5159796
PRJEB18113	SAMEA5159797
PRJEB18113	SAMEA5159798
PRJEB18113	SAMEA5159799
PRJEB18113	SAMEA5159800
PRJEB18113	SAMEA5159801
PRJEB18113	SAMEA5159802
PRJEB18113	SAMEA5159803
PRJEB18113	SAMEA5159804
PRJEB18113	SAMEA5159805
PRJEB18113	SAMEA5159806
PRJEB18113	SAMEA5159807
PRJEB18113	SAMEA5159808
PRJEB18113	SAMEA5159809
PRJEB18113	SAMEA5159810
PRJEB18113	SAMEA5159811
PRJEB18113	SAMEA5159812
PRJEB18113	SAMEA5159813
PRJEB18113	SAMEA5159814
PRJEB18113	SAMEA5159815
PRJEB18113	SAMEA5159816
PRJEB18113	SAMEA5159817
PRJEB18113	SAMEA5159818
PRJEB18113	SAMEA5159819
PRJEB18113	SAMEA5159820
PRJEB18113	SAMEA5159821
PRJEB18113	SAMEA5159822
PRJEB18113	SAMEA5159823
PRJEB18113	SAMEA5159824
PRJEB18113	SAMEA5159825
PRJEB18113	SAMEA5159826
PRJEB18113	SAMEA5159827
PRJEB18113	SAMEA5159828
PRJEB14604	SAMEA4051550
PRJEB18113	SAMEA19846918
PRJEB18113	SAMEA4560538
PRJEB18113	SAMEA19847668
PRJEB18113	SAMEA19848418
PRJEB18113	SAMEA19849168
PRJEB14604	SAMEA4051548
PRJEB18113	SAMEA5159829
PRJEB18113	SAMEA5159830
PRJEB18113	SAMEA5159831
PRJEB18113	SAMEA19849918
PRJEB18113	SAMEA5159832
PRJEB18113	SAMEA5159833
PRJEB18113	SAMEA4644726
PRJEB18113	SAMEA32980918
PRJEB18113	SAMEA4644727
PRJEB18113	SAMEA32981668
PRJEB18113	SAMEA32982418
PRJEB18113	SAMEA4644728
PRJEB5965	SAMEA2422242
PRJEB18113	SAMEA5159835
PRJEB18113	SAMEA32998168
PRJEB18113	SAMEA32999668
PRJEB18113	SAMEA33668668
PRJEB18113	SAMEA19852168
PRJEB18113	SAMEA19852918
PRJEB18113	SAMEA19853668
PRJEB18113	SAMEA4644753
PRJEB18113	SAMEA19864168
PRJEB18113	SAMEA19864918
PRJEB18113	SAMEA4644765
PRJEB18113	SAMEA4644766
PRJEB18113	SAMEA4644767
PRJEB18113	SAMEA5159836
PRJEB18113	SAMEA5159837
PRJEB18113	SAMEA4644768
PRJEB18113	SAMEA19865668
PRJEB18113	SAMEA33000418
PRJEB18113	SAMEA5160152
PRJEB18113	SAMEA5159839
PRJEB18113	SAMEA4644769
PRJEB18113	SAMEA5159840
PRJEB18113	SAMEA5159841
PRJEB18113	SAMEA5159842
PRJEB18113	SAMEA5159843
PRJEB18113	SAMEA19866418
PRJEB18113	SAMEA19867168
PRJEB18113	SAMEA5159844
PRJEB18113	SAMEA19867918
PRJEB18113	SAMEA5159845
PRJEB18113	SAMEA5159846
PRJEB18113	SAMEA5159847
PRJEB18113	SAMEA19872418
PRJEB18113	SAMEA5159848
PRJEB18113	SAMEA33001168
PRJEB18113	SAMEA33001918
PRJEB8226	SAMEA3209361
PRJEB18113	SAMEA5159849
PRJEB18113	SAMEA5159850
PRJEB18113	SAMEA19868668
PRJEB18113	SAMEA19869418
PRJEB18113	SAMEA19870168
PRJEB18113	SAMEA5159890
PRJEB18113	SAMEA19871668
PRJEB18113	SAMEA5160021
PRJEB18113	SAMEA5159851
PRJEB18113	SAMEA5160153
PRJEB18113	SAMEA33004168
PRJEB18113	SAMEA5159853
PRJEB18113	SAMEA5159854
PRJEB7707	SAMEA3113485
PRJEB18113	SAMEA5159855
PRJEB18113	SAMEA5159857
PRJEB18113	SAMEA5159856
PRJEB18113	SAMEA5159858
PRJEB18113	SAMEA5159859
PRJEB18113	SAMEA5159860
PRJEB18113	SAMEA5159861
PRJEB18113	SAMEA5159862
PRJEB18113	SAMEA5159863
PRJEB18113	SAMEA5159864
PRJEB18113	SAMEA5159865
PRJEB18113	SAMEA5159866
PRJEB18113	SAMEA5159867
PRJEB18113	SAMEA5159868
PRJEB18113	SAMEA5159869
PRJEB18113	SAMEA5159870
PRJEB18113	SAMEA5159871
PRJEB18113	SAMEA5159872
PRJEB18113	SAMEA5159873
PRJEB18113	SAMEA5159874
PRJEB18113	SAMEA5159875
PRJEB18113	SAMEA5159876
PRJEB18113	SAMEA5159877
PRJEB18113	SAMEA5159878
PRJEB18113	SAMEA5159879
PRJEB18113	SAMEA5159880
PRJEB18113	SAMEA5159881
PRJEB18113	SAMEA5159882
PRJEB18113	SAMEA5159883
PRJEB18113	SAMEA5159884
PRJEB18113	SAMEA5159885
PRJEB18113	SAMEA19874668
PRJEB18113	SAMEA32983168
PRJEB18113	SAMEA32983918
PRJEB18113	SAMEA32984668
PRJEB18113	SAMEA33004918
PRJEB18113	SAMEA33669418
PRJEB18113	SAMEA19309168
PRJEB18113	SAMEA19875418
PRJEB18113	SAMEA32985418
PRJEB18113	SAMEA19877668
PRJEB18113	SAMEA32988418
PRJEB18113	SAMEA32990668
PRJEB18113	SAMEA19309918
PRJEB18113	SAMEA32992918
PRJEB18113	SAMEA32986918
PRJEB18113	SAMEA32991418
PRJEB18113	SAMEA32992168
PRJEB12092	SAMEA3706814
PRJEB12092	SAMEA3706815
PRJEB12092	SAMEA3706816
PRJEB18113	SAMEA32987668
PRJEB18113	SAMEA32989168
PRJEB18113	SAMEA32995168
PRJEB18113	SAMEA32995918
PRJEB18113	SAMEA32996668
PRJEB7528	SAMEA2821387
PRJEB7527	SAMEA2821386
PRJEB18113	SAMEA19310668
PRJEB18113	SAMEA32997418
PRJEB18113	SAMEA19311418
PRJEB18113	SAMEA19312168
PRJEB12095	SAMEA3706830
PRJEB12093	SAMEA3706824
PRJEB12093	SAMEA3706825
PRJEB12093	SAMEA3706826
PRJEB12094	SAMEA3706827
PRJEB12094	SAMEA3706828
PRJEB12094	SAMEA3706829
PRJEB11963	SAMEA3682653
PRJEB11963	SAMEA3682654
PRJEB18113	SAMEA4644729
PRJEB18113	SAMEA19312918
PRJEB18113	SAMEA19313668
PRJEB18113	SAMEA19314418
PRJEB18113	SAMEA19315168
PRJEB18113	SAMEA19316668
PRJEB18113	SAMEA19317418
PRJEB18113	SAMEA19318168
PRJEB18113	SAMEA19318918
PRJEB18113	SAMEA19323418
PRJEB18113	SAMEA19320418
PRJEB18113	SAMEA19321168
PRJEB18113	SAMEA19321918
PRJEB18113	SAMEA19322668
PRJEB18113	SAMEA4644754
PRJEB18113	SAMEA4644755
PRJEB18113	SAMEA4644756
PRJEB18113	SAMEA19324918
PRJEB18113	SAMEA19325668
PRJEB18113	SAMEA5159886
PRJEB18113	SAMEA4644730
PRJEB18113	SAMEA4644731
PRJEB18113	SAMEA4644732
PRJEB18113	SAMEA4644733
PRJEB18113	SAMEA4644734
PRJEB18113	SAMEA4644735
PRJEB18113	SAMEA4644736
PRJEB18113	SAMEA4644737
PRJEB18113	SAMEA4644752
PRJEB18113	SAMEA4644738
PRJEB18113	SAMEA4644757
PRJEB18113	SAMEA4644739
PRJEB18113	SAMEA4644740
PRJEB18113	SAMEA4644741
PRJEB18113	SAMEA4644742
PRJEB18113	SAMEA4644758
PRJEB18113	SAMEA4644743
PRJEB18113	SAMEA4644744
PRJEB18113	SAMEA4644745
PRJEB18113	SAMEA4644746
PRJEB18113	SAMEA4644747
PRJEB18113	SAMEA4644748
PRJEB18113	SAMEA4644749
PRJEB18113	SAMEA4644750
PRJEB18113	SAMEA4644759
PRJEB18113	SAMEA4644760
PRJEB18113	SAMEA4644761
PRJEB18113	SAMEA4644751
PRJEB18113	SAMEA4644762
PRJEB18113	SAMEA4644763
PRJEB18113	SAMEA4644764
PRJEB18113	SAMEA19876168
PRJEB18113	SAMEA19876918
PRJEB11962	SAMEA3682652
PRJEB18113	SAMEA5159887
PRJEB18113	SAMEA5159888
PRJEB18113	SAMEA5159889
PRJEB5435	SAMEA2357050
PRJEB28191	SAMEA4827645
PRJEB28191	SAMEA4827646
PRJEB28191	SAMEA4827647
PRJEB28191	SAMEA4827648
PRJEB28191	SAMEA4827649
PRJEB28191	SAMEA4827650
PRJEB28191	SAMEA4827651
PRJEB28191	SAMEA4827652
PRJEB28191	SAMEA4827653
PRJEB28191	SAMEA4827654
PRJEB28191	SAMEA4827655
PRJEB28191	SAMEA4827656
PRJEB28191	SAMEA4827657
PRJEB28191	SAMEA4827658
PRJEB28191	SAMEA4827659
PRJEB28191	SAMEA4827660
PRJEB28191	SAMEA4827661
PRJEB28191	SAMEA4827662
PRJEB28191	SAMEA4827663
PRJEB28191	SAMEA4827664
PRJEB28191	SAMEA4827665
PRJEB28191	SAMEA4827666
PRJEB28191	SAMEA4827667
PRJEB28191	SAMEA4827668
PRJEB28191	SAMEA4827669
PRJEB28191	SAMEA4827670
PRJEB28191	SAMEA4827671
PRJEB28191	SAMEA4827672
PRJEB28191	SAMEA4827673
PRJEB28191	SAMEA4827674
PRJEB28191	SAMEA5059741
PRJEB28191	SAMEA5059742
PRJEB28191	SAMEA5059743
PRJEB28191	SAMEA5059744
PRJEB28191	SAMEA5059745
PRJEB28191	SAMEA5059746
PRJEB28191	SAMEA5059747
PRJEB28191	SAMEA5059748
PRJEB28191	SAMEA5059749
PRJEB28191	SAMEA5059750
PRJEB28191	SAMEA5059751
PRJEB28191	SAMEA5059752
PRJEB28191	SAMEA5059753
PRJEB28191	SAMEA5059754
PRJEB28191	SAMEA5059755
PRJEB28191	SAMEA5059756
PRJEB28191	SAMEA5059757
PRJEB28191	SAMEA5059758
PRJEB28191	SAMEA5059759
PRJEB18113	SAMEA4560543
PRJEB18113	SAMEA32989918
PRJEB18113	SAMEA5415483
PRJEB18113	SAMEA5415484
PRJEB18113	SAMEA5566449
PRJEB18113	SAMEA5415485
PRJEB18113	SAMEA5415486
PRJEB18113	SAMEA5415487
PRJEB18113	SAMEA5415488
PRJEB18113	SAMEA5415489
PRJEB18113	SAMEA5415490
PRJEB18113	SAMEA5415491
PRJEB18113	SAMEA5415492
PRJEB18113	SAMEA5415493
PRJEB18113	SAMEA5415494
PRJEB18113	SAMEA5415495
PRJEB18113	SAMEA5415496
PRJEB18113	SAMEA5415497
PRJEB18113	SAMEA5415498
PRJEB18113	SAMEA5415499
PRJEB18113	SAMEA5415500
PRJEB18113	SAMEA5415501
PRJEB18113	SAMEA5415502
PRJEB18113	SAMEA5415503
PRJEB18113	SAMEA5564710
PRJEB18113	SAMEA5564711
PRJEB18113	SAMEA5564712
PRJEB18113	SAMEA5564713
PRJEB18113	SAMEA5564714
PRJEB18113	SAMEA5564715
PRJEB18113	SAMEA5564716
PRJEB18113	SAMEA5564717
PRJEB18113	SAMEA5564718
PRJEB18113	SAMEA5564719
PRJEB18113	SAMEA5564720
PRJEB18113	SAMEA5564721
PRJEB18113	SAMEA5564722
PRJEB18113	SAMEA5564723
PRJEB18113	SAMEA5564724
PRJEB18113	SAMEA5564725
PRJEB18113	SAMEA5564726
PRJEB18113	SAMEA5564727
PRJEB18113	SAMEA5564728
PRJEB18113	SAMEA5564729
PRJEB18113	SAMEA5564730
PRJEB18113	SAMEA5564731
PRJEB18113	SAMEA5564732
PRJEB18113	SAMEA5564733
PRJEB18113	SAMEA5564734
PRJEB18113	SAMEA5564735
PRJEB18113	SAMEA5564736
PRJEB18113	SAMEA5564737
PRJEB18113	SAMEA5714967
PRJEB18113	SAMEA5714968
PRJEB18113	SAMEA5714969
PRJEB18113	SAMEA5714970
PRJEB18113	SAMEA5714971
PRJEB18113	SAMEA5714972
PRJEB18113	SAMEA5714973
PRJEB18113	SAMEA5714974
PRJEB18113	SAMEA5714975
PRJEB18113	SAMEA5714976
PRJEB18113	SAMEA5714977
PRJEB18113	SAMEA5714978
PRJEB18113	SAMEA5714979
PRJEB18113	SAMEA5714980
PRJEB18113	SAMEA5714981
PRJEB18113	SAMEA5716181
	SAMN08473804
	SAMN10598557
	SAMN10598558
	SAMEA3390167
	SAMEA3390170
	SAMN09379712
	SAMN08612501
	SAMN08612529
	SAMN08612533
	SAMN08612544
	SAMEA3390189
	SAMEA3390191
	SAMN09510423
